# Supplementary material for: Disability Transitions and Health Expectancies among Elderly People Aged 65 Years and Over in China: A Nationwide Longitudinal Study
Source: PubMed Central journal article supplement (PMC6844588; doi:10.14336/ad.2019.0121), 2019-12-01
Supplement: AD-10-6-1246-s.pdf [file AD-10-6-1246-s.pdf]

## **Disability Transitions and Health Expectancies among Elderly People Aged 65 Years and Over in China: A Nationwide Longitudinal Study**

**Chengbei Hou<sup>1,2#</sup>, Yuan Ma<sup>1,2#</sup>, Xinghua Yang<sup>1,2</sup>, Lixin Tao<sup>1,2</sup>, Deqiang Zheng<sup>1,2</sup>, Xiangtong Liu<sup>1,2</sup>, Xiaonan Wang<sup>1,2</sup>, Xia Li<sup>3</sup>, Wei Wang<sup>4</sup>, Xianghua Fang<sup>5\*</sup>, Xiuhua Guo<sup>1,2\*</sup>**

<sup>1</sup>School of Public Health, Capital Medical University, Beijing, China.

<sup>2</sup>Beijing Municipal Key Laboratory of Clinical Epidemiology, School of Public Health, Capital Medical University, Beijing, China

<sup>3</sup>Department of Mathematics and Statistics, La Trobe University, Bundoora Victoria, Australia.

<sup>4</sup>School of Medical Sciences and Health, Edith Cowan University, Joondalup, Perth, WA6027, Australia.

<sup>5</sup>Center for Evidence-Based Medicine, Xuanwu Hospital Capital Medical University, Beijing, China

# SUPPLEMENTARY DATA

**Supplementary Table 1.** Total life expectancy and life expectancy free from and with disability, and proportion of remaining life without or with disability at age 65-95, by gender and region, based on initial disability state.

| Age | Initial state-Urban male |               |               | Initial state-Urban female |               |               | Initial state-Rural male |               |               | Initial state-Rural female |               |               |
|-----|--------------------------|---------------|---------------|----------------------------|---------------|---------------|--------------------------|---------------|---------------|----------------------------|---------------|---------------|
|     | No                       | Mild          | Severe        | No                         | Mild          | Severe        | No                       | Mild          | Severe        | No                         | Mild          | Severe        |
| 65  |                          |               |               |                            |               |               |                          |               |               |                            |               |               |
| TL  | 15.07                    | 14.58         | 12.63         | 17.08                      | 16.55         | 14.75         | 14.72                    | 14.22         | 12.09         | 16.55                      | 16.02         | 14.10         |
| E   | (14.66,15.46)            | (14.21,14.95) | (11.78,13.40) | (16.72,17.51)              | (16.18,16.99) | (13.96,15.73) | (14.35,15.08)            | (13.87,14.57) | (11.44,12.68) | (16.19,16.89)              | (15.64,16.38) | (13.42,14.75) |
| ND  | 11.14                    | 9.66          | 6.88          | 10.72                      | 8.95          | 6.78          | 10.9                     | 9.5           | 6.66          | 10.15                      | 8.53          | 6.29          |
|     | (10.79,11.5)             | (9.16,10.7)   | (5.74,7.9)    | (10.41,11.04)              | (8.5,9.43)    | (5.66,8.2)    | (10.58,11.17)            | (9.12,9.85)   | (5.97,7.2)    | (9.87,10.44)               | (8.16,8.92)   | (5.62,7.05)   |
| PN  | 73.95                    | 66.25         | 54.5          | 62.77                      | 54.08         | 45.96         | 74.06                    | 66.81         | 55.07         | 61.36                      | 53.21         | 44.60         |
| D   | (72.64,75.18)            | (63.79,68.59) | (48.21,59.89) | (61.47,64.01)              | (51.77,56.45) | (39.90,52.60) | (73.03,75.06)            | (64.85,68.44) | (51.14,57.99) | (60.14,62.53)              | (51.44,54.96) | (41.31,48.43) |
| M   | 2.50                     | 3.37          | 2.33          | 4.42                       | 5.48          | 4.01          | 2.88                     | 3.68          | 2.83          | 5.02                       | 6.00          | 4.77          |
| D   | (2.35,2.67)              | (3.1,3.65)    | (2.11,2.5)    | (4.21,4.6)                 | (5.12,5.8)    | (3.71,4.3)    | (2.73,3.0)               | (3.44,3.9)    | (2.59,3.1)    | (4.8,5.24)                 | (5.72,6.2)    | (4.42,5.2)    |
| PM  | 16.56                    | 23.10         | 18.44         | 25.89                      | 33.1          | 27.17         | 19.53                    | 25.88         | 23.40         | 30.36                      | 37.43         | 33.85         |
| D   | (15.63,17.50)            | (21.25,25.16) | (17.1,20.4)   | (24.83,27.14)              | (31.00,35.24) | (25.57,29.78) | (18.69,20.36)            | (24.36,27.55) | (21.7,25.32)  | (29.37,31.49)              | (35.76,39.04) | (31.74,36.13) |
| SD  | 1.43                     | 1.55          | 3.42          | 1.94                       | 2.12          | 3.96          | 0.94                     | 1.04          | 2.6           | 1.37                       | 1.50          | 3.04          |
|     | (1.26,1.59)              | (1.38,1.7)    | (2.84,3.9)    | (1.78,2.1)                 | (1.94,2.2)    | (3.21,4.6)    | (0.85,1.0)               | (0.95,1.1)    | (2.31,2.9)    | (1.28,1.4)                 | (1.38,1.6)    | (2.65,3.4)    |
| PS  | 9.48                     | 10.65         | 27.06         | 11.34                      | 12.82         | 26.87         | 6.41                     | 7.30          | 21.53         | 8.27                       | 9.35          | 21.56         |
| D   | (8.32,10.57)             | (9.48,11.80)  | (21.87,32.73) | (10.42,12.25)              | (11.63,13.82) | (20.66,32.23) | (5.79,7.1)               | (6.68,8.0)    | (18.71,25.23) | (7.73,8.9)                 | (8.64,10.14)  | (18.38,24.86) |
| 75  |                          |               |               |                            |               |               |                          |               |               |                            |               |               |
| TL  | 9.04                     | 8.19          | 6.47          | 10.46                      | 9.61          | 7.89          | 8.70                     | 7.85          | 6.06          | 9.99                       | 9.19          | 7.44          |
| E   | (8.82,9.28)              | (7.96,8.43)   | (6.1,6.86)    | (10.23,10.74)              | (9.35,9.88)   | (7.51,8.33)   | (8.51,8.91)              | (7.64,8.08)   | (5.73,6.37)   | (9.77,10.21)               | (8.96,9.43)   | (7.07,7.76)   |
| ND  | 5.72                     | 3.60          | 1.87          | 5.19                       | 3.03          | 1.77          | 5.44                     | 3.48          | 1.82          | 4.74                       | 2.83          | 1.63          |
|     | (5.53,5.93)              | (3.35,3.85)   | (1.52,2.2)    | (5.02,5.37)                | (2.83,3.24)   | (1.43,2.09)   | (5.28,5.61)              | (3.29,3.66)   | (1.6,2.02)    | (4.59,4.89)                | (2.68,2.99)   | (1.43,1.8)    |
| PN  | 63.26                    | 43.92         | 28.82         | 49.57                      | 31.60         | 22.47         | 62.58                    | 44.40         | 30.01         | 47.44                      | 30.84         | 21.91         |
| D   | (61.70,64.71)            | (41.32,46.33) | (24.40,32.93) | (48.08,50.88)              | (29.73,33.47) | (18.68,25.69) | (61.41,63.75)            | (42.42,46.22) | (27.19,32.75) | (46.21,48.72)              | (29.49,32.10) | (19.75,23.77) |
| M   | 2.15                     | 3.18          | 1.51          | 3.59                       | 4.58          | 2.43          | 2.46                     | 3.40          | 1.94          | 4.05                       | 4.95          | 3.06          |
| D   | (2.04,2.30)              | (2.99,3.37)   | (1.36,1.69)   | (3.43,3.77)                | (4.36,4.81)   | (2.21,2.7)    | (2.36,2.59)              | (3.25,3.55)   | (1.75,2.14)   | (3.90,4.20)                | (4.78,5.13)   | (2.80,3.36)   |
| PM  | 23.80                    | 38.88         | 23.38         | 34.28                      | 47.65         | 30.76         | 28.31                    | 43.36         | 31.99         | 40.50                      | 53.88         | 41.10         |
| D   | (22.65,25.16)            | (36.78,41.02) | (21.45,25.61) | (33.03,35.65)              | (45.72,49.59) | (28.46,33.66) | (27.26,29.43)            | (41.73,45.09) | (29.61,34.50) | (39.32,41.69)              | (52.55,55.28) | (38.50,43.87) |
| SD  | 1.17                     | 1.41          | 3.09          | 1.69                       | 1.99          | 3.69          | 0.79                     | 0.96          | 2.30          | 1.20                       | 1.40          | 2.75          |
|     | (1.05,1.28)              | (1.28,1.52)   | (2.84,3.3)    | (1.57,1.81)                | (1.85,2.14)   | (3.42,3.9)    | (0.73,0.8)               | (0.88,1.05)   | (2.11,2.52)   | (1.13,1.29)                | (1.30,1.51)   | (2.56,3.0)    |
| PS  | 12.94                    | 17.20         | 47.79         | 16.14                      | 20.76         | 46.77         | 9.11                     | 12.24         | 38.00         | 12.06                      | 15.28         | 36.99         |
| D   | (11.64,14.13)            | (15.64,18.69) | (43.45,52.38) | (15.14,17.22)              | (19.18,22.22) | (43.1,50.45)  | (8.42,9.7)               | (11.27,13.29) | (34.8,41.58)  | (11.38,12.85)              | (14.34,16.34) | (33.91,40.42) |
| 85  |                          |               |               |                            |               |               |                          |               |               |                            |               |               |
| TL  | 4.95                     | 4.15          | 3.16          | 5.89                       | 5.14          | 4.01          | 4.66                     | 3.88          | 2.83          | 5.52                       | 4.84          | 3.65          |
| E   | (4.81,5.11)              | (3.99,4.29)   | (2.97,3.38)   | (5.72,6.06)                | (4.97,5.33)   | (3.8,4.21)    | (4.54,4.8)               | (3.76,4.0)    | (2.67,2.98)   | (5.39,5.66)                | (4.72,4.97)   | (3.48,3.79)   |
| ND  | 2.60                     | 0.88          | 0.32          | 2.22                       | 0.69          | 0.31          | 2.37                     | 0.83          | 0.30          | 1.94                       | 0.63          | 0.27          |
|     | (2.49,2.73)              | (0.8,0.96)    | (0.24,0.43)   | (2.1,2.34)                 | (0.63,0.75)   | (0.23,0.36)   | (2.27,2.47)              | (0.76,0.89)   | (0.26,0.38)   | (1.84,2.05)                | (0.58,0.68)   | (0.23,0.3)    |
|     | 52.56                    | 21.11         | 10.22         | 37.7                       | 13.48         | 7.63          | 50.93                    | 21.31         | 10.74         | 35.1                       | 13.06         | 7.40          |

# SUPPLEMENTARY DATA

|    |               |               |               |               |               |               |               |               |               |               |               |               |
|----|---------------|---------------|---------------|---------------|---------------|---------------|---------------|---------------|---------------|---------------|---------------|---------------|
| PN | (50.69,54.34) | (19.44,23.02) | (7.84,13.26)  | (35.87,39.34) | (12.40,14.62) | (5.86,9.04)   | (49.27,52.52) | (19.79,22.9)  | (9.26,13.46)  | (33.44,36.79) | (12.09,14.01) | (6.29,8.29)   |
| D  | 1.54          | 2.24          | 0.67          | 2.44          | 2.97          | 1.04          | 1.72          | 2.34          | 0.90          | 2.69          | 3.16          | 1.38          |
| M  | (1.45,1.64)   | (2.12,2.36)   | (0.58,0.77)   | (2.30,2.56)   | (2.82,3.13)   | (0.92,1.17)   | (1.64,1.82)   | (2.24,2.43)   | (0.78,1.01)   | (2.59,2.80)   | (3.05,3.26)   | (1.25,1.49)   |
| D  | 31.14         | 54.04         | 21.10         | 41.38         | 57.65         | 25.85         | 37.03         | 60.26         | 31.75         | 48.83         | 65.26         | 37.93         |
| PM | (29.25,33.1)  | (51.79,56.02) | (18.61,23.82) | (39.6,43.15)  | (55.92,59.35) | (23.41,28.68) | (35.62,38.70) | (58.52,61.83) | (28.08,35.40) | (47.28,50.40) | (63.98,66.54) | (35.16,40.19) |
| D  | 0.81          | 1.03          | 2.17          | 1.23          | 1.48          | 2.67          | 0.56          | 0.71          | 1.63          | 0.89          | 1.05          | 2.00          |
| SD | (0.73,0.89)   | (0.94,1.12)   | (2.02,2.33)   | (1.15,1.32)   | (1.40,1.59)   | (2.51,2.84)   | (0.52,0.60)   | (0.65,0.77)   | (1.50,1.76)   | (0.83,0.95)   | (0.98,1.11)   | (1.89,2.13)   |
| D  | 16.30         | 24.85         | 68.68         | 20.92         | 28.86         | 66.52         | 12.04         | 18.43         | 57.51         | 16.07         | 21.68         | 54.67         |
| PS | (14.91,17.82) | (22.99,26.79) | (65.23,71.60) | (19.65,22.34) | (27.22,30.58) | (63.84,69.45) | (11.16,12.95) | (17.13,19.77) | (53.53,61.01) | (15.12,17.05) | (20.52,22.86) | (52.37,57.81) |
| D  | 2.50          | 2.01          | 1.53          | 3.09          | 2.64          | 2.00          | 2.31          | 1.83          | 1.30          | 2.84          | 2.43          | 1.73          |
| TL | (2.39,2.63)   | (1.90,2.12)   | (1.40,1.67)   | (2.96,3.23)   | (2.51,2.79)   | (1.87,2.15)   | (2.20,2.42)   | (1.73,1.91)   | (1.19,1.40)   | (2.73,2.96)   | (2.32,2.54)   | (1.62,1.84)   |
| E  | 1.10          | 0.16          | 0.04          | 0.89          | 0.12          | 0.04          | 0.96          | 0.14          | 0.04          | 0.74          | 0.11          | 0.03          |
| ND | (1.00,1.19)   | (0.14,0.18)   | (0.03,0.08)   | (0.8,0.98)    | (0.11,0.14)   | (0.03,0.06)   | (0.87,1.05)   | (0.13,0.16)   | (0.03,0.07)   | (0.65,0.83)   | (0.10,0.12)   | (0.02,0.04)   |
| D  | 43.97         | 7.74          | 2.70          | 28.76         | 4.58          | 2.02          | 41.65         | 7.77          | 2.74          | 25.98         | 4.42          | 1.89          |
| PN | (40.91,46.72) | (6.93,8.81)   | (1.79,5.16)   | (26.05,31.39) | (4.06,5.22)   | (1.34,2.78)   | (38.72,44.68) | (6.86,8.80)   | (2.14,5.24)   | (23.41,28.89) | (3.91,5.00)   | (1.46,2.35)   |
| D  | 0.94          | 1.25          | 0.22          | 1.45          | 1.62          | 0.35          | 1.02          | 1.26          | 0.31          | 1.56          | 1.69          | 0.49          |
| M  | (0.86,1.01)   | (1.16,1.34)   | (0.18,0.28)   | (1.34,1.56)   | (1.51,1.74)   | (0.29,0.40)   | (0.94,1.09)   | (1.18,1.33)   | (0.25,0.38)   | (1.47,1.65)   | (1.60,1.79)   | (0.42,0.54)   |
| D  | 37.42         | 62.14         | 14.46         | 46.92         | 61.44         | 17.46         | 44.09         | 69.16         | 23.72         | 54.86         | 69.42         | 28.07         |
| PM | (34.77,40.24) | (59.03,64.93) | (11.95,17.96) | (44.19,49.62) | (58.79,63.92) | (15.09,20.14) | (41.48,47.7)  | (66.79,71.15) | (19.28,23.53) | (52.23,57.43) | (67.49,71.49) | (24.84,29.90) |
| D  | 0.47          | 0.60          | 1.27          | 0.75          | 0.90          | 1.61          | 0.33          | 0.42          | 0.95          | 0.54          | 0.64          | 1.21          |
| SD | (0.41,0.53)   | (0.54,0.68)   | (1.14,1.39)   | (0.68,0.83)   | (0.82,0.99)   | (1.49,1.76)   | (0.29,0.37)   | (0.38,0.47)   | (0.85,1.05)   | (0.49,0.60)   | (0.58,0.69)   | (1.12,1.31)   |
| D  | 18.61         | 30.12         | 82.83         | 24.32         | 33.98         | 80.52         | 14.26         | 23.07         | 73.54         | 19.16         | 26.16         | 70.04         |
| PS | (16.76,20.9)  | (27.26,33.48) | (79.67,85.17) | (22.06,26.80) | (31.52,36.72) | (77.93,82.98) | (12.80,15.81) | (20.81,25.37) | (68.39,74.49) | (17.33,20.88) | (23.97,28.22) | (67.18,73.30) |
| D  | 95            |               |               |               |               |               |               |               |               |               |               |               |

Note: Data come from the Chinese Longitudinal Healthy Longevity Survey (CLHLS).

Data are n (95%CI). TLE=total life expectancy; ND=years with no disability; MD=years with mild disability; SD=years with severe disability; AD=years with any disability (MD+SD); PND=proportion of life with no disability; PMD=proportion of life with mild disability; PSD=proportion of life with severe disability; PAD=proportion of life with any disability (PMD+PSD). None=no disability; Mild=mild disability; Severe=severe disability.

# SUPPLEMENTARY DATA

**Supplementary Table 2.** Demographic characteristics and health status of participants and comparison between genders, urban-rural residences.

| Variables                       | Men<br>(N=9704) | Women(N=9915) | $\chi^2$    | P          | Urban<br>(N=7756) | Rural<br>(N=11863) | $\chi^2$    | P          |
|---------------------------------|-----------------|---------------|-------------|------------|-------------------|--------------------|-------------|------------|
| Educational attainment, N (%)   |                 |               | 3917.8<br>2 | <0.00<br>1 |                   |                    | 761.01      | <0.00<br>1 |
| 0 year                          | 3401 (30.3)     | 7820 (69.7)   |             |            | 3743 (33.4)       | 7478 (66.6)        |             |            |
| 1-6 years                       | 4592 (73.7)     | 1635 (26.3)   |             |            | 2647 (42.5)       | 3580 (57.5)        |             |            |
| 7-9 years                       | 837 (79.2)      | 220 (20.8)    |             |            | 588 (55.6)        | 469 (44.4)         |             |            |
| 9 + years                       | 849 (81.6)      | 192 (18.4)    |             |            | 744 (71.5)        | 297 (28.5)         |             |            |
| Currently married, N (%)        | 5074 (67.4)     | 2450 (32.6)   | 1578.5<br>5 | <0.00<br>1 | 3088 (41.0)       | 4436 (59.0)        | 11.56       | 0.001      |
| Currently smoking, N (%)        | 3611 (82.9)     | 743 (17.1)    | 2508.0<br>3 | <0.00<br>1 | 1585 (36.4)       | 2769 (63.6)        | 22.90       | <0.00<br>1 |
| Currently drinking, N (%)       | 3270 (77.5)     | 952 (22.5)    | 1684.4<br>9 | <0.00<br>1 | 1524 (36.1)       | 2698 (63.9)        | 26.55       | <0.00<br>1 |
| Enough living expenses, N (%)   | 7807 (50.5)     | 7649 (49.5)   | 31.78       | <0.00<br>1 | 6386 (41.3)       | 9070 (58.7)        | 96.75       | <0.00<br>1 |
| Adequate medical service, N (%) | 8875 (50.0)     | 8874 (50.0)   | 21.41       | <0.00<br>1 | 7231 (40.7)       | 10518 (59.3)       | 113.18      | <0.00<br>1 |
| Physical exercise, N (%)        | 3628 (58.1)     | 2614 (41.9)   | 274.59      | <0.00<br>1 | 3518 (56.4)       | 2724 (43.6)        | 1083.1<br>3 | <0.00<br>1 |
| Diabetes, N (%)                 | 228 (46.7)      | 260 (53.3)    | 1.50        | 0.221      | 314 (64.3)        | 174 (35.7)         | 128.74      | <0.00<br>1 |
| Stroke, N (%)                   | 603 (54.0)      | 513 (46.0)    | 9.90        | 0.002      | 558 (50.0)        | 558 (50.0)         | 54.12       | <0.00<br>1 |
| Cardiovascular disease, N (%)   | 764 (44.5)      | 954 (55.5)    | 18.73       | <0.00<br>1 | 1016 (59.1)       | 702 (40.9)         | 302.49      | <0.00<br>1 |
| Disability at entry, N (%)      |                 |               | 516.21      | <0.00<br>1 |                   |                    | 152.08      | <0.00<br>1 |
| No impaired                     | 5314<br>(58.1)  | 3834 (41.9)   |             |            | 3719 (40.7)       | 5429 (59.3)        |             |            |
| Mild impaired                   | 3106<br>(42.7)  | 4166 (57.3)   |             |            | 2528 (34.8)       | 4744 (65.2)        |             |            |
| Severe impaired                 | 1284<br>(40.1)  | 1915 (59.9)   |             |            | 1509 (47.2)       | 1690 (52.8)        |             |            |

Note: Data come from the Chinese Longitudinal Healthy Longevity Survey (CLHLS).

Numbers calculated as a percentage of the nonmissing values.

The number of participants with missing values at entry was 73 for education, 2 for marital status, 14 for currently smoking, 14 for currently drinking, 4 for living expense, and 4 for medical service, 30 for physical activity, 6 for diabetes, 4 for cardiovascular disease, 5 for stroke.

# SUPPLEMENTARY DATA

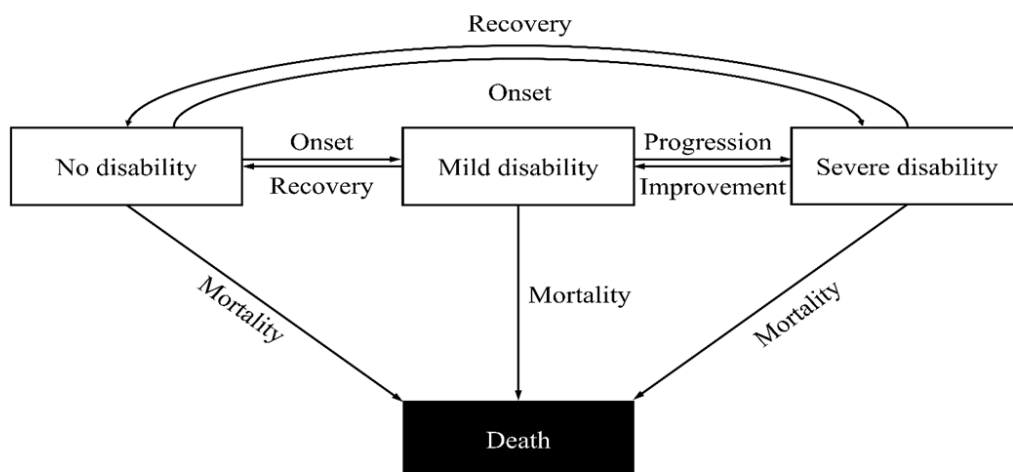

Supplementary Figure 1. Structure of the multi-state model of disability transitions.
